# Supplementary material for: Synthesis, structure and characterization of three new Mg-containing phosphates with deep-UV cut-off edges
Source: Royal Society of Chemistry journal article supplement (doi:10.1039/c9nj06311k), 2020-01-01
Supplement: c9nj06311k1.pdf [file c9nj06311k1.pdf]

## Electronic Supplementary Information

### Syntheses, Structures and Characterization of Three New Mg-containing Phosphates with Deep-UV Cut-off Edges

Zhen Qian,<sup>a</sup> Hongping Wu,<sup>a</sup> Hongwei Yu,<sup>\*a</sup> Zhanggui Hu,<sup>a</sup> Jiyang Wang,<sup>a</sup> and Yicheng Wu<sup>a</sup>

<sup>a</sup>Tianjin Key Laboratory of Functional Crystal Materials, Institute of Functional Crystal, Tianjin University of Technology, Tianjin 300384, China.

#### CONTENTS

|                                                                                                                                                           |     |
|-----------------------------------------------------------------------------------------------------------------------------------------------------------|-----|
| 1. Table S1 (Atomic coordinates, displacement parameters and BVS).....                                                                                    | S2  |
| 2. Table S2 (Selected bond distances and angles).....                                                                                                     | S5  |
| 3. Table S3 (The EDS results for AMg <sub>2</sub> P <sub>3</sub> O <sub>10</sub> (A = Li, Cs) and Rb <sub>2</sub> MgP <sub>2</sub> O <sub>7</sub> ) ..... | S10 |
| 4. Figure S1 (Experimental and calculated XRD patterns).....                                                                                              | S12 |
| 5. Figure S2 (Coordination and connection of Rb in Rb <sub>2</sub> MgP <sub>2</sub> O <sub>7</sub> ).....                                                 | S13 |
| 6. Figure S3 (Structure of LiMg <sub>3</sub> P <sub>3</sub> O <sub>10</sub> viewed along the <i>a</i> , <i>b</i> and <i>c</i> axis ).....                 | S14 |

**Table S1a.** Atomic coordinates ( $\times 10^4$ ) and equivalent isotropic displacement parameters ( $\text{\AA}^2 \times 10^3$ ) for  $\text{LiMg}_2\text{P}_3\text{O}_{10}$ .  $U_{\text{eq}}$  is defined as one-third of the trace of the orthogonalized  $U_{ij}$  tensor.

| Atom  | x        | y       | z        | $U_{\text{eq}}$ | BVS   |
|-------|----------|---------|----------|-----------------|-------|
| Li(1) | 0        | 0       | 5000     | 29(2)           | 0.849 |
| Mg(1) | 10383(2) | 665(1)  | -1656(1) | 7(1)            | 2.074 |
| P(1)  | 6039(2)  | 2500    | 337(1)   | 4(1)            | 4.986 |
| P(2)  | 4628(2)  | 2500    | 6438(1)  | 5(1)            | 4.923 |
| P(3)  | 3329(2)  | 2500    | 3204(1)  | 5(1)            | 5.028 |
| O(1)  | 7757(3)  | 993(2)  | 144(2)   | 7(1)            | 1.977 |
| O(2)  | 2859(3)  | 1006(2) | 6575(2)  | 8(1)            | 1.916 |
| O(3)  | 2997(5)  | 2500    | -577(2)  | 7(1)            | 1.979 |
| O(4)  | 1594(3)  | 996(2)  | 3098(2)  | 10(1)           | 1.979 |
| O(5)  | 7640(5)  | 2500    | 7395(2)  | 6(1)            | 1.982 |
| O(6)  | 5553(5)  | 2500    | 4745(2)  | 7(1)            | 2.024 |
| O(7)  | 5642(5)  | 2500    | 2085(2)  | 11(1)           | 2.204 |

**Table S1b.** Atomic coordinates ( $\times 10^4$ ) and equivalent isotropic displacement parameters ( $\text{\AA}^2 \times 10^3$ ) for  $\text{CsMg}_2\text{P}_3\text{O}_{10}$ .  $U_{\text{eq}}$  is defined as one-third of the trace of the orthogonalized  $U_{ij}$  tensor.

| Atom  | x        | y       | z       | $U_{\text{eq}}$ | BVS   |
|-------|----------|---------|---------|-----------------|-------|
| Cs(1) | 5000     | 1660(1) | 2500    | 40(1)           | 0.917 |
| Mg(1) | 1833(1)  | 39(1)   | -490(1) | 9(1)            | 2.119 |
| P(1)  | 0        | 1181(1) | 2500    | 9(1)            | 4.967 |
| P(2)  | 390(1)   | 2943(1) | 774(1)  | 9(1)            | 4.991 |
| O(1)  | 246(2)   | 1512(2) | 136(2)  | 13(1)           | 1.999 |
| O(2)  | 1082(2)  | 2293(2) | 1826(1) | 12(1)           | 2.009 |
| O(3)  | -1225(3) | 287(2)  | 1895(1) | 15(1)           | 1.828 |
| O(4)  | -1317(3) | 3622(2) | 982(2)  | 17(1)           | 1.837 |
| O(5)  | 1750(3)  | 4033(2) | 471(2)  | 18(1)           | 1.921 |

**Table S1c.** Atomic coordinates ( $\times 10^4$ ) and equivalent isotropic displacement parameters ( $\text{\AA}^2 \times 10^3$ ) for  $\text{Rb}_2\text{MgP}_2\text{O}_7$ .  $U_{\text{eq}}$  is defined as one-third of the trace of the orthogonalized  $U_{ij}$  tensor.

| Atom  | x       | y       | z        | $U_{\text{eq}}$ | BVS   |
|-------|---------|---------|----------|-----------------|-------|
| Mg(1) | 3193(4) | 2500    | -1171(6) | 22(2)           | 1.994 |
| Rb(1) | 831(1)  | 2500    | 6519(2)  | 30(1)           | 0.99  |
| Rb(2) | 1223(1) | 7500    | 190(2)   | 31(1)           | 1.065 |
| P(1)  | 2545(1) | 2500    | 2161(5)  | 20(1)           | 5.142 |
| P(2)  | 749(3)  | 2500    | 2702(5)  | 20(1)           | 5.169 |
| O(1)  | 3076(8) | 2500    | 890(12)  | 34(4)           | 1.927 |
| O(2)  | 863(6)  | 141(13) | 3547(10) | 40(3)           | 1.811 |
| O(3)  | -11(9)  | 2500    | 1764(16) | 56(4)           | 2.081 |
| O(4)  | 1564(7) | 2500    | 1607(12) | 28(3)           | 2.344 |
| O(5)  | 2657(5) | 96(11)  | 3010(8)  | 27(2)           | 2.02  |

|                     |            |                     |            |
|---------------------|------------|---------------------|------------|
| Li(1)-O(2)          | 1.9733(15) | O(4)#1-Li(1)-O(4)   | 180.00(4)  |
| Li(1)-O(2)#1        | 1.9733(15) | O(3)-P(1)-O(1)      | 113.15(7)  |
| Li(1)-O(4)#1        | 2.1207(17) | O(3)-P(1)-O(1)#8    | 113.15(7)  |
| Li(1)-O(4)          | 2.1207(17) | O(1)-P(1)-O(1)#8    | 113.50(12) |
| Mg(1)-O(4)#2        | 2.0260(18) | O(3)-P(1)-O(7)      | 107.57(13) |
| Mg(1)-O(1)#4        | 2.0430(18) | O(1)-P(1)-O(7)      | 104.23(8)  |
| Mg(1)-O(5)#5        | 2.0947(16) | O(1)#8-P(1)-O(7)    | 104.22(8)  |
| Mg(1)-O(2)#6        | 2.0986(17) | O(2)#8-P(2)-O(2)    | 112.57(13) |
| Mg(1)-O(3)#7        | 2.1042(16) | O(2)#8-P(2)-O(5)    | 114.28(7)  |
| Mg(1)-O(1)          | 2.1658(17) | O(2)-P(2)-O(5)      | 114.28(7)  |
| P(1)-O(3)           | 1.514(2)   | O(2)#8-P(2)-O(6)    | 106.86(8)  |
| P(1)-O(1)           | 1.5174(16) | O(2)-P(2)-O(6)      | 106.86(8)  |
| P(1)-O(1)#8         | 1.5174(16) | O(5)-P(2)-O(6)      | 100.69(12) |
| P(1)-O(7)           | 1.601(2)   | O(4)-P(3)-O(4)#8    | 116.16(13) |
| P(2)-O(2)#8         | 1.5118(16) | O(4)-P(3)-O(7)      | 111.47(8)  |
| P(2)-O(2)           | 1.5118(16) | O(4)#8-P(3)-O(7)    | 111.47(8)  |
| P(2)-O(5)           | 1.518(2)   | O(4)-P(3)-O(6)      | 108.95(8)  |
| P(2)-O(6)           | 1.632(2)   | O(4)#8-P(3)-O(6)    | 108.95(8)  |
| P(3)-O(4)           | 1.4921(16) | O(7)-P(3)-O(6)      | 98.29(12)  |
| P(3)-O(4)#8         | 1.4921(16) | O(4)#2-Mg(1)-O(1)#4 | 93.25(8)   |
| P(3)-O(7)           | 1.562(2)   | O(4)#2-Mg(1)-O(5)#5 | 93.60(7)   |
| P(3)-O(6)           | 1.594(2)   | O(1)#4-Mg(1)-O(5)#5 | 160.36(8)  |
| O(1)-Mg(1)#4        | 2.0431(18) | O(4)#2-Mg(1)-O(2)#6 | 81.73(7)   |
| O(2)-Mg(1)#3        | 2.0986(17) | O(1)#4-Mg(1)-O(2)#6 | 111.90(7)  |
| O(3)-Mg(1)#10       | 2.1042(16) | O(5)#5-Mg(1)-O(2)#6 | 87.30(8)   |
| O(3)-Mg(1)#11       | 2.1042(16) | O(4)#2-Mg(1)-O(3)#7 | 166.54(8)  |
| O(4)-Mg(1)#2        | 2.0260(18) | O(1)#4-Mg(1)-O(3)#7 | 92.37(7)   |
| O(5)-Mg(1)#12       | 2.0947(16) | O(5)#5-Mg(1)-O(3)#7 | 85.08(7)   |
| O(5)-Mg(1)#13       | 2.0947(16) | O(2)#6-Mg(1)-O(3)#7 | 84.83(8)   |
| O(2)-Li(1)-O(2)#1   | 180        | O(4)#2-Mg(1)-O(1)   | 108.37(7)  |
| O(2)-Li(1)-O(4)#1   | 82.41(6)   | O(1)#4-Mg(1)-O(1)   | 79.58(7)   |
| O(2)#1-Li(1)-O(4)#1 | 97.59(6)   | O(5)#5-Mg(1)-O(1)   | 80.80(8)   |
| O(2)-Li(1)-O(4)     | 97.59(6)   | O(2)#6-Mg(1)-O(1)   | 164.75(8)  |
| O(2)#1-Li(1)-O(4)   | 82.41(6)   | O(3)#7-Mg(1)-O(1)   | 84.68(8)   |

**Table S2a.** Selected bond distances (Å) and angles (deg.) for LiMg<sub>2</sub>P<sub>3</sub>O<sub>10</sub>.

Symmetry transformations used to generate equivalent atoms:

#1 -x,-y,-z+1    #2 -x+1,-y,-z    #3 x-1,y,z+1  
#4 -x+2,-y,-z    #5 x,y,z-1    #6 x+1,y,z-1  
#7 x+1,y,z    #8 x,-y+1/2,z    #9 x-1,-y+1/2,z+1  
#10 x-1,y,z    #11 x-1,-y+1/2,z    #12 x,-y+1/2,z+1    #13 x,y,z+1

**Table S2b.** Selected bond distances (Å) and angles (deg.) for CsMg<sub>2</sub>P<sub>3</sub>O<sub>10</sub>.

|                       |            |                     |            |
|-----------------------|------------|---------------------|------------|
| Cs(1)-O(2)#1          | 3.2701(19) | O(2)#1-Cs(1)-O(3)#2 | 44.24(5)   |
| Cs(1)-O(2)            | 3.2701(19) | O(2)-Cs(1)-O(3)#2   | 146.91(5)  |
| Cs(1)-O(3)#2          | 3.312(2)   | O(2)#1-Cs(1)-O(3)#3 | 146.91(5)  |
| Cs(1)-O(3)#3          | 3.312(2)   | O(2)-Cs(1)-O(3)#3   | 44.24(5)   |
| Cs(1)-O(3)#4          | 3.403(2)   | O(3)#2-Cs(1)-O(3)#3 | 137.74(7)  |
| Cs(1)-O(3)#5          | 3.403(2)   | O(2)#1-Cs(1)-O(3)#4 | 69.22(5)   |
| Cs(1)-O(4)#6          | 3.523(2)   | O(2)-Cs(1)-O(3)#4   | 92.43(5)   |
| Cs(1)-O(4)#7          | 3.523(2)   | O(3)#2-Cs(1)-O(3)#4 | 91.04(3)   |
| Mg(1)-O(5)#6          | 1.938(2)   | O(3)#3-Cs(1)-O(3)#4 | 130.57(6)  |
| Mg(1)-O(4)#10         | 1.985(2)   | O(2)#1-Cs(1)-O(3)#5 | 92.43(5)   |
| Mg(1)-O(1)            | 1.986(2)   | O(2)-Cs(1)-O(3)#5   | 69.22(5)   |
| Mg(1)-O(3)#11         | 2.009(2)   | O(3)#2-Cs(1)-O(3)#5 | 130.57(6)  |
| Mg(1)-O(1)#11         | 2.177(2)   | O(3)#3-Cs(1)-O(3)#5 | 91.04(3)   |
| P(1)-O(3)             | 1.492(2)   | O(3)#4-Cs(1)-O(3)#5 | 43.97(7)   |
| P(1)-O(3)#3           | 1.492(2)   | O(2)#1-Cs(1)-O(4)#6 | 90.90(5)   |
| P(1)-O(2)             | 1.588(2)   | O(2)-Cs(1)-O(4)#6   | 103.71(5)  |
| P(1)-O(2)#3           | 1.588(2)   | O(3)#2-Cs(1)-O(4)#6 | 46.86(5)   |
| P(2)-O(5)             | 1.491(2)   | O(3)#3-Cs(1)-O(4)#6 | 98.22(5)   |
| P(2)-O(4)             | 1.497(2)   | O(3)#4-Cs(1)-O(4)#6 | 117.86(5)  |
| P(2)-O(1)             | 1.527(2)   | O(3)#5-Cs(1)-O(4)#6 | 157.49(5)  |
| P(2)-O(2)             | 1.6448(19) | O(2)#1-Cs(1)-O(4)#7 | 103.71(5)  |
| O(1)-Mg(1)#11         | 2.177(2)   | O(2)-Cs(1)-O(4)#7   | 90.90(5)   |
| O(3)-Mg(1)#11         | 2.009(2)   | O(3)#2-Cs(1)-O(4)#7 | 98.22(5)   |
| O(4)-Mg(1)#16         | 1.985(2)   | O(3)#3-Cs(1)-O(4)#7 | 46.86(5)   |
| O(5)-Mg(1)#4          | 1.938(2)   | O(3)#4-Cs(1)-O(4)#7 | 157.49(5)  |
| O(3)-Cs(1)#14         | 3.312(2)   | O(3)#5-Cs(1)-O(4)#7 | 117.86(5)  |
| O(3)-Cs(1)#13         | 3.403(2)   | O(4)#6-Cs(1)-O(4)#7 | 82.79(7)   |
| O(4)-Cs(1)#15         | 3.523(2)   | O(3)-P(1)-O(3)#3    | 117.25(17) |
| O(5)#6-Mg(1)-O(4)#10  | 94.23(10)  | O(3)-P(1)-O(2)      | 109.87(10) |
| O(5)#6-Mg(1)-O(1)     | 111.09(10) | O(3)#3-P(1)-O(2)    | 107.14(11) |
| O(4)#10-Mg(1)-O(1)    | 103.37(10) | O(3)-P(1)-O(2)#3    | 107.14(11) |
| O(5)#6-Mg(1)-O(3)#11  | 136.71(10) | O(3)#3-P(1)-O(2)#3  | 109.87(10) |
| O(4)#10-Mg(1)-O(3)#11 | 86.03(9)   | O(2)-P(1)-O(2)#3    | 104.91(15) |
| O(1)-Mg(1)-O(3)#11    | 110.91(9)  | O(5)-P(2)-O(4)      | 116.65(13) |
| O(5)#6-Mg(1)-O(1)#11  | 90.09(9)   | O(5)-P(2)-O(1)      | 114.28(12) |
| O(4)#10-Mg(1)-O(1)#11 | 172.94(9)  | O(4)-P(2)-O(1)      | 111.39(12) |
| O(1)-Mg(1)-O(1)#11    | 80.19(9)   | O(5)-P(2)-O(2)      | 103.03(11) |
| O(3)#11-Mg(1)-O(1)#11 | 87.00(8)   | O(4)-P(2)-O(2)      | 105.45(11) |
| O(2)#1-Cs(1)-O(2)     | 160.61(7)  | O(1)-P(2)-O(2)      | 104.44(11) |

Symmetry transformations used to generate equivalent atoms:

#1  $-x+1,y,-z+1/2$     #2  $x+1,y,z$     #3  $-x,y,-z+1/2$   
#4  $-x+1/2,y+1/2,z$     #5  $x+1/2,y+1/2,-z+1/2$   
#6  $-x+1/2,y-1/2,z$     #7  $x+1/2,y-1/2,-z+1/2$   
#8  $-x+1,-y,-z$     #9  $x,-y,z+1/2$     #10  $x+1/2,-y+1/2,-z$   
#11  $-x,-y,-z$     #12  $-x+1/2,-y+1/2,z-1/2$   
#13  $x-1/2,y-1/2,-z+1/2$     #14  $x-1,y,z$   
#15  $x-1/2,y+1/2,-z+1/2$     #16  $x-1/2,-y+1/2,-z$

**Table S2c.** Selected bond distances (Å) and angles (deg.) for Rb<sub>2</sub>MgP<sub>2</sub>O<sub>7</sub>.

|               |           |                       |            |
|---------------|-----------|-----------------------|------------|
| P(1)-O(1)     | 1.473(12) | O(2)#13-Rb(1)-O(2)    | 100.33(19) |
| P(1)-O(5)#1   | 1.509(7)  | O(5)#14-Rb(1)-O(2)    | 126.1(2)   |
| P(1)-O(5)     | 1.509(7)  | O(5)#11-Rb(1)-O(2)    | 103.8(2)   |
| P(1)-O(4)     | 1.621(12) | O(2)#6-Rb(1)-O(2)#1   | 100.33(19) |
| P(2)-O(3)     | 1.488(14) | O(2)#13-Rb(1)-O(2)#1  | 79.1(3)    |
| P(2)-O(2)#1   | 1.488(8)  | O(5)#14-Rb(1)-O(2)#1  | 103.8(2)   |
| P(2)-O(2)     | 1.488(8)  | O(5)#11-Rb(1)-O(2)#1  | 126.1(2)   |
| P(2)-O(4)     | 1.648(12) | O(2)-Rb(1)-O(2)#1     | 46.9(3)    |
| Mg(1)-O(1)    | 1.984(13) | O(2)#6-Rb(1)-O(1)#2   | 148.4(2)   |
| Mg(1)-O(2)#8  | 2.038(9)  | O(2)#13-Rb(1)-O(1)#2  | 95.1(3)    |
| Mg(1)-O(2)#4  | 2.038(9)  | O(5)#14-Rb(1)-O(1)#2  | 46.6(3)    |
| Mg(1)-O(5)#4  | 2.055(8)  | O(5)#11-Rb(1)-O(1)#2  | 92.3(3)    |
| Mg(1)-O(5)#8  | 2.055(8)  | O(2)-Rb(1)-O(1)#2     | 98.3(3)    |
| O(1)-Rb(1)#3  | 3.182(8)  | O(2)#1-Rb(1)-O(1)#2   | 59.4(2)    |
| O(1)-Rb(1)#4  | 3.182(8)  | O(2)#6-Rb(1)-O(1)#11  | 95.1(3)    |
| O(2)-Mg(1)#11 | 2.038(9)  | O(2)#13-Rb(1)-O(1)#11 | 148.4(2)   |
| O(2)-Rb(1)#6  | 2.984(10) | O(5)#14-Rb(1)-O(1)#11 | 92.3(3)    |
| O(2)-Rb(1)    | 3.106(10) | O(5)#11-Rb(1)-O(1)#11 | 46.6(3)    |
| O(2)-Rb(2)#5  | 3.548(11) | O(2)-Rb(1)-O(1)#11    | 59.4(2)    |
| O(3)-Rb(2)#12 | 2.662(15) | O(2)#1-Rb(1)-O(1)#11  | 98.3(3)    |
| O(3)-Rb(1)#6  | 3.347(10) | O(1)#2-Rb(1)-O(1)#11  | 110.7(4)   |
| O(3)-Rb(1)#7  | 3.347(10) | O(2)#6-Rb(1)-O(3)#6   | 46.3(3)    |
| O(3)-Rb(2)    | 3.582(11) | O(2)#13-Rb(1)-O(3)#6  | 92.0(3)    |
| O(3)-Rb(2)#5  | 3.582(11) | O(5)#14-Rb(1)-O(3)#6  | 114.2(3)   |
| O(4)-Rb(2)#5  | 2.997(7)  | O(5)#11-Rb(1)-O(3)#6  | 73.7(3)    |
| O(4)-Rb(2)    | 2.997(7)  | O(2)-Rb(1)-O(3)#6     | 98.4(3)    |
| O(5)-Mg(1)#11 | 2.055(8)  | O(2)#1-Rb(1)-O(3)#6   | 140.2(3)   |
| O(5)-Rb(2)#2  | 3.003(8)  | O(1)#2-Rb(1)-O(3)#6   | 160.3(3)   |
| O(5)-Rb(1)#4  | 3.075(8)  | O(1)#11-Rb(1)-O(3)#6  | 69.8(3)    |
| Rb(1)-O(2)#6  | 2.984(10) | O(2)#6-Rb(1)-O(3)#7   | 92.0(3)    |
| Rb(1)-O(2)#13 | 2.984(10) | O(2)#13-Rb(1)-O(3)#7  | 46.3(3)    |
| Rb(1)-O(5)#14 | 3.075(9)  | O(5)#14-Rb(1)-O(3)#7  | 73.7(3)    |
| Rb(1)-O(5)#11 | 3.075(8)  | O(5)#11-Rb(1)-O(3)#7  | 114.2(3)   |
| Rb(1)-O(2)#1  | 3.106(10) | O(2)-Rb(1)-O(3)#7     | 140.2(3)   |
| Rb(1)-O(1)#2  | 3.182(8)  | O(2)#1-Rb(1)-O(3)#7   | 98.4(3)    |
| Rb(1)-O(1)#11 | 3.182(8)  | O(1)#2-Rb(1)-O(3)#7   | 69.8(3)    |
| Rb(1)-O(3)#6  | 3.347(10) | O(1)#11-Rb(1)-O(3)#7  | 160.3(3)   |
| Rb(1)-O(3)#7  | 3.347(10) | O(3)#6-Rb(1)-O(3)#7   | 102.9(4)   |
| Rb(2)-O(3)#12 | 2.662(15) | O(3)#12-Rb(2)-O(4)#15 | 116.4(2)   |
| Rb(2)-O(4)#15 | 2.997(7)  | O(3)#12-Rb(2)-O(4)    | 116.4(2)   |
| Rb(2)-O(5)#8  | 3.003(8)  | O(4)#15-Rb(2)-O(4)    | 121.8(4)   |



|                       |           |                       |          |
|-----------------------|-----------|-----------------------|----------|
| Rb(2)-O(5)#3          | 3.003(8)  | O(3)#12-Rb(2)-O(5)#8  | 85.6(4)  |
| Rb(2)-O(2)#15         | 3.548(11) | O(4)#15-Rb(2)-O(5)#8  | 125.3(3) |
| Rb(2)-O(2)#1          | 3.548(11) | O(4)-Rb(2)-O(5)#8     | 81.1(3)  |
| Rb(2)-O(3)#15         | 3.582(11) | O(3)#12-Rb(2)-O(5)#3  | 85.6(4)  |
| O(1)-P(1)-O(5)#1      | 112.4(4)  | O(4)#15-Rb(2)-O(5)#3  | 81.1(3)  |
| O(1)-P(1)-O(5)        | 112.4(4)  | O(4)-Rb(2)-O(5)#3     | 125.3(3) |
| O(5)#1-P(1)-O(5)      | 113.1(6)  | O(5)#8-Rb(2)-O(5)#3   | 49.6(3)  |
| O(1)-P(1)-O(4)        | 105.1(7)  | O(3)#12-Rb(2)-O(2)#15 | 121.8(3) |
| O(5)#1-P(1)-O(4)      | 106.6(4)  | O(4)#15-Rb(2)-O(2)#15 | 43.6(2)  |
| O(5)-P(1)-O(4)        | 106.6(4)  | O(4)-Rb(2)-O(2)#15    | 87.6(3)  |
| O(3)-P(2)-O(2)#1      | 115.1(5)  | O(5)#8-Rb(2)-O(2)#15  | 152.5(2) |
| O(3)-P(2)-O(2)        | 115.1(5)  | O(5)#3-Rb(2)-O(2)#15  | 124.1(2) |
| O(2)#1-P(2)-O(2)      | 112.2(8)  | O(3)#12-Rb(2)-O(2)#1  | 121.8(3) |
| O(3)-P(2)-O(4)        | 103.2(7)  | O(4)#15-Rb(2)-O(2)#1  | 87.6(3)  |
| O(2)#1-P(2)-O(4)      | 104.8(5)  | O(4)-Rb(2)-O(2)#1     | 43.6(2)  |
| O(2)-P(2)-O(4)        | 104.8(5)  | O(5)#8-Rb(2)-O(2)#1   | 124.1(2) |
| O(1)-Mg(1)-O(2)#8     | 101.4(4)  | O(5)#3-Rb(2)-O(2)#1   | 152.5(2) |
| O(1)-Mg(1)-O(2)#4     | 101.4(4)  | O(2)#15-Rb(2)-O(2)#1  | 45.9(2)  |
| O(2)#8-Mg(1)-O(2)#4   | 85.5(5)   | O(3)#12-Rb(2)-O(3)    | 85.1(3)  |
| O(1)-Mg(1)-O(5)#4     | 108.8(4)  | O(4)#15-Rb(2)-O(3)    | 122.9(3) |
| O(2)#8-Mg(1)-O(5)#4   | 149.8(5)  | O(4)-Rb(2)-O(3)       | 42.8(3)  |
| O(2)#4-Mg(1)-O(5)#4   | 88.1(3)   | O(5)#8-Rb(2)-O(3)     | 107.4(2) |
| O(1)-Mg(1)-O(5)#8     | 108.8(4)  | O(5)#3-Rb(2)-O(3)     | 155.9(2) |
| O(2)#8-Mg(1)-O(5)#8   | 88.1(3)   | O(2)#15-Rb(2)-O(3)    | 79.5(3)  |
| O(2)#4-Mg(1)-O(5)#8   | 149.8(5)  | O(2)#1-Rb(2)-O(3)     | 41.3(3)  |
| O(5)#4-Mg(1)-O(5)#8   | 82.8(5)   | O(3)#12-Rb(2)-O(3)#15 | 85.1(3)  |
| O(2)#6-Rb(1)-O(2)#13  | 55.2(3)   | O(4)#15-Rb(2)-O(3)#15 | 42.8(3)  |
| O(2)#6-Rb(1)-O(5)#14  | 153.4(3)  | O(4)-Rb(2)-O(3)#15    | 122.9(3) |
| O(2)#13-Rb(1)-O(5)#14 | 119.0(2)  | O(5)#8-Rb(2)-O(3)#15  | 155.9(2) |
| O(2)#6-Rb(1)-O(5)#11  | 119.0(2)  | O(5)#3-Rb(2)-O(3)#15  | 107.4(2) |
| O(2)#13-Rb(1)-O(5)#11 | 153.4(3)  | O(2)#15-Rb(2)-O(3)#15 | 41.3(3)  |
| O(5)#14-Rb(1)-O(5)#11 | 52.5(3)   | O(2)#1-Rb(2)-O(3)#15  | 79.5(3)  |
| O(2)#6-Rb(1)-O(2)     | 79.1(3)   | O(3)-Rb(2)-O(3)#15    | 93.9(4)  |

---

Symmetry transformations used to generate equivalent atoms:

- #1  $x, -y+1/2, z$     #2  $-x+1/2, -y+1, z+1/2$   
#3  $-x+1/2, -y+1, z-1/2$     #4  $-x+1/2, -y, z-1/2$   
#5  $x, y-1, z$     #6  $-x, -y, -z+1$     #7  $-x, -y+1, -z+1$   
#8  $-x+1/2, y+1/2, z-1/2$     #9  $x+1/2, y, -z+1/2$   
#10  $x, y, z-1$     #11  $-x+1/2, -y, z+1/2$     #12  $-x, -y+1, -z$   
#13  $-x, y+1/2, -z+1$     #14  $-x+1/2, y+1/2, z+1/2$   
#15  $x, y+1, z$

**Table S3.** EDS results for  $\text{LiMg}_2\text{P}_3\text{O}_{10}$  (a),  $\text{CsMg}_2\text{P}_3\text{O}_{10}$  (b) and  $\text{Rb}_2\text{MgP}_2\text{O}_7$  (c).

(a)

| Point 1 |          |          |         | Point 2 |                                 |          |         |
|---------|----------|----------|---------|---------|---------------------------------|----------|---------|
| Element | Weight % | Atomic % | Formula | Element | Weight %                        | Atomic % | Formula |
| Mg      | 15.75    | 17.98    | 2.0     | Mg      | 15.85                           | 17.79    | 2.0     |
| P       | 30.12    | 32.28    | 3.2     | P       | 31.23                           | 33.32    | 3.1     |
| O       | 54.13    | 49.74    | □       | O       | 52.92                           | 48.89    | □       |
| Toals   | 100      | □        | □       | Toals   | 100                             | □        | □       |
| Point 3 |          |          |         | □       |                                 |          |         |
| Element | Weight % | Atomic % | Formula | □       |                                 |          |         |
| Mg      | 16.83    | 18.23    | 2.1     | □       | Average ratio                   |          | □       |
| P       | 29.82    | 32.35    | 3.0     | □       |                                 |          | □       |
| O       | 53.35    | 49.42    | □       | □       |                                 |          | □       |
| Toals   | 100      | □        | □       | □       | $\text{Mg}_{2.0}\text{P}_{3.1}$ |          | □       |

(b)

| Point 1 |          |          |         | Point 2 |                                                |          |         |
|---------|----------|----------|---------|---------|------------------------------------------------|----------|---------|
| Element | Weight % | Atomic % | Formula | Element | Weight %                                       | Atomic % | Formula |
| Cs      | 31.59    | 9.89     | 1.1     | Cs      | 32.31                                          | 9.93     | 1.2     |
| Mg      | 12.13    | 18.37    | 2.0     | Mg      | 13.15                                          | 19.02    | 2.0     |
| P       | 20.83    | 31.56    | 3.1     | P       | 21.02                                          | 30.79    | 3.0     |
| O       | 35.45    | 40.81    | □       | O       | 33.52                                          | 40.26    | □       |
| Toals   | 100      | □        | □       | Toals   | 100                                            | □        | □       |
| Point 3 |          |          |         | □       |                                                |          |         |
| Element | Weight % | Atomic % | Formula | □       |                                                |          |         |
| Cs      | 30.87    | 9.35     | 1.0     | □       | Average ratio                                  |          | □       |
| Mg      | 12.34    | 19.15    | 2.1     | □       |                                                |          | □       |
| P       | 21.83    | 29.89    | 3.2     | □       |                                                |          | □       |
| O       | 34.96    | 41.61    | □       | □       | $\text{Cs}_{1.1}\text{Mg}_{2.0}\text{P}_{3.1}$ |          | □       |
| Toals   | 100      | □        | □       | □       | □                                              | □        | □       |

(c)

| Point 1 |          |          |         | Point 2 |                                                      |          |         |
|---------|----------|----------|---------|---------|------------------------------------------------------|----------|---------|
| Element | Weight % | Atomic % | Formula | Element | Weight %                                             | Atomic % | Formula |
| Rb      | 48.73    | 18.78    | 2.1     | Cs      | 47.76                                                | 19.39    | 2.2     |
| Mg      | 6.23     | 13.23    | 1.2     | Mg      | 7.45                                                 | 10.32    | 1.0     |
| P       | 15.98    | 19.54    | 2.2     | P       | 17.48                                                | 18.43    | 2.2     |
| O       | 29.06    | 48.45    | □       | O       | 27.31                                                | 51.86    | □       |
| Toals   | 100      | □        | □       | Toals   | 100                                                  | □        | □       |
| Point 3 |          |          |         | □       |                                                      |          |         |
| Element | Weight % | Atomic % | Formula | □       |                                                      |          |         |
| Cs      | 45.36    | 20.32    | 2.0     | □       | Average ratio                                        |          | □       |
| Mg      | 5.98     | 9.97     | 1.1     | □       |                                                      |          | □       |
| P       | 15.87    | 17.63    | 2.1     | □       | Rb <sub>2.1</sub> Mg <sub>1.1</sub> P <sub>2.1</sub> |          | □       |
| O       | 32.79    | 52.08    | □       | □       |                                                      |          | □       |
| Toals   | 100      | □        | □       | □       | □                                                    | □        | □       |

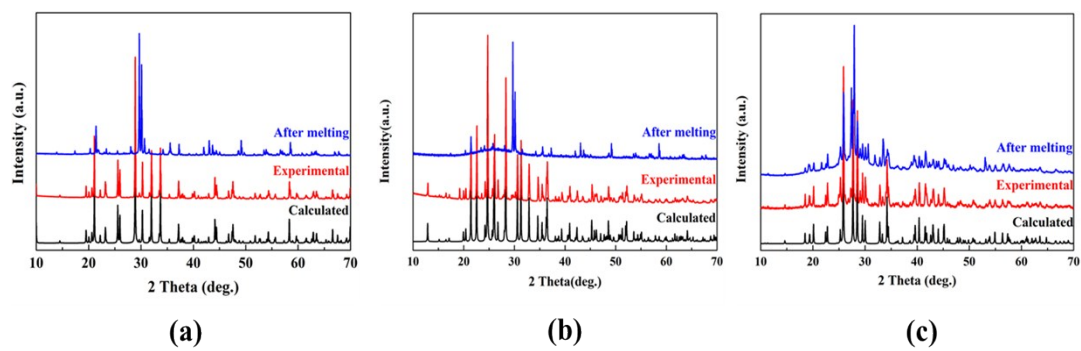

**Figure S1.** Experimental and calculated XRD patterns for (a)  $\text{LiMg}_2\text{P}_3\text{O}_{10}$ , (b)  $\text{CsMg}_2\text{P}_3\text{O}_{10}$  and (c)  $\text{Rb}_2\text{MgP}_2\text{O}_7$ .

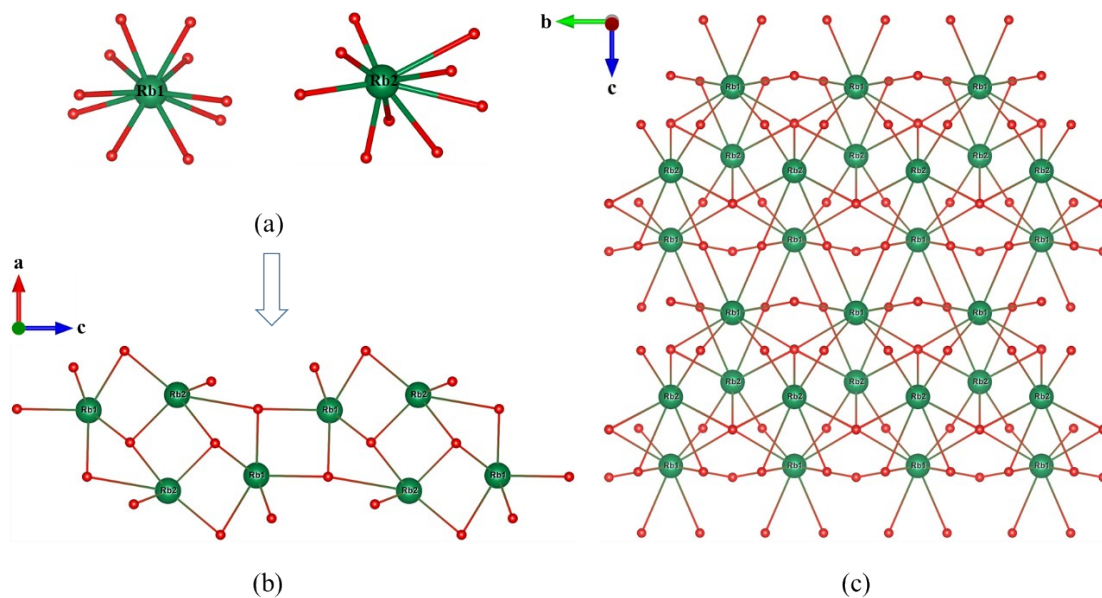

**Figure S2.** (a) The ten-coordinated Rb(1) and nine-coordinated Rb(2) cations; (b) the 2D Rb-O layers extending in *ac* plane; (c) the 2D Rb-O layers extending in *bc* plane.

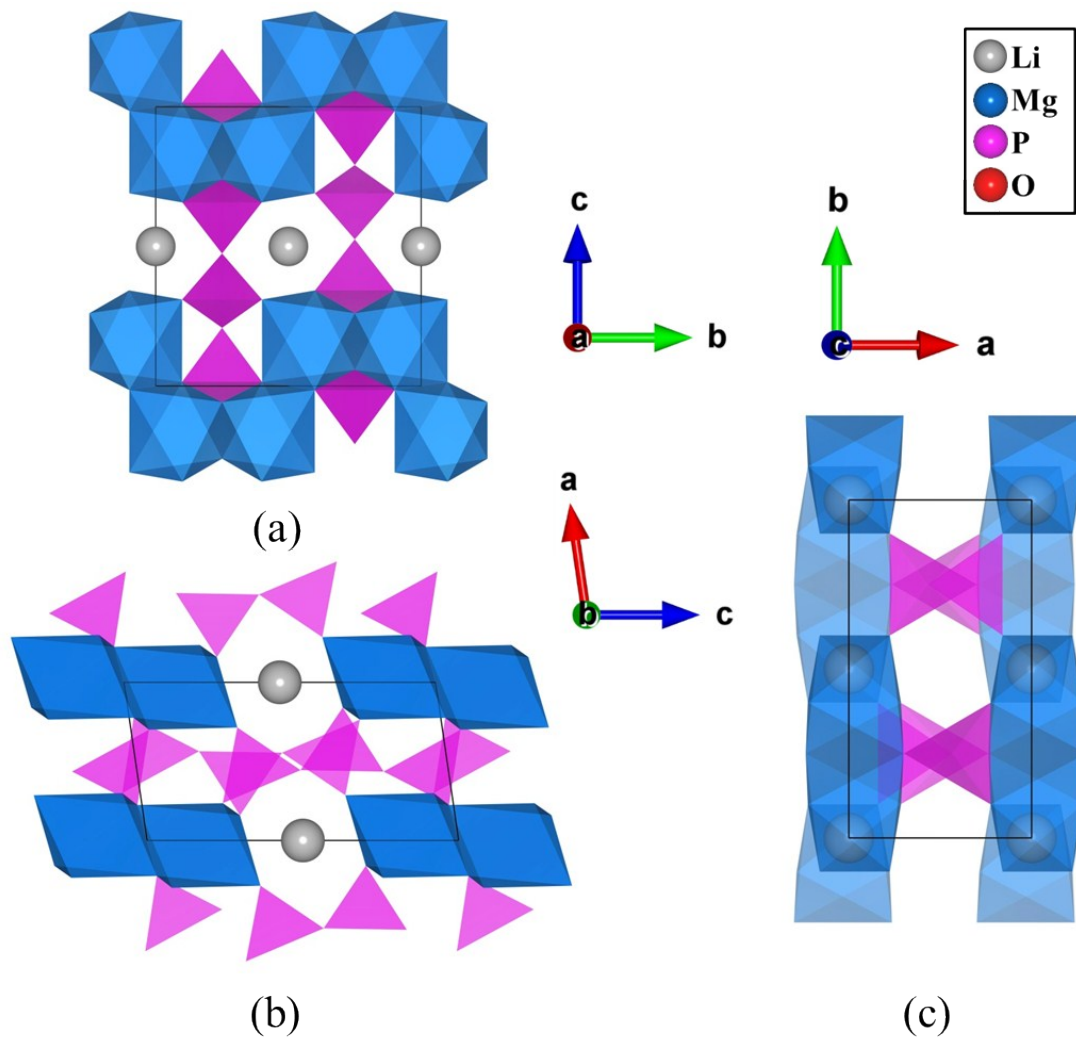

**Figure S3.** Structure of  $\text{LiMg}_3\text{P}_3\text{O}_{10}$  viewed along the (a)  $a$ -axis, (b)  $b$ -axis and (c)  $c$ -axis directions.
